# Supplementary material for: Effects of low oxygen concentrations on aerobic methane oxidation in seasonally hypoxic coastal waters
Source: Copernicus journal article supplement (doi:10.5194/bg-2016-422), 2016-10-19

Figure S1. Methane-carbon assimilation in relation to oxygen concentration. Methane-carbon assimilation was determined from incubations amended with  $^{14}\text{C-CH}_4$  at saturated ( $\sim 220 \mu\text{mol l}^{-1}$ , shaded bars) or low oxygen concentrations ( $<0.5 \mu\text{mol l}^{-1}$ , black bars) of water recovered in Nov. 2013 at 20 mbsl (a, c) and in Feb. 2014 at 5 and 20 mbsl (b, d). Incubations were performed in triplicates and standard deviations are indicated. (a, b) First-order rate constant  $k$ . (c, d) Fraction of oxidized methane incorporated into biomass. Asterisks indicate a p-value  $<0.05$  of a two-tailed, two-sample t-test assuming equal variance between the samples at low and high oxygen concentrations.

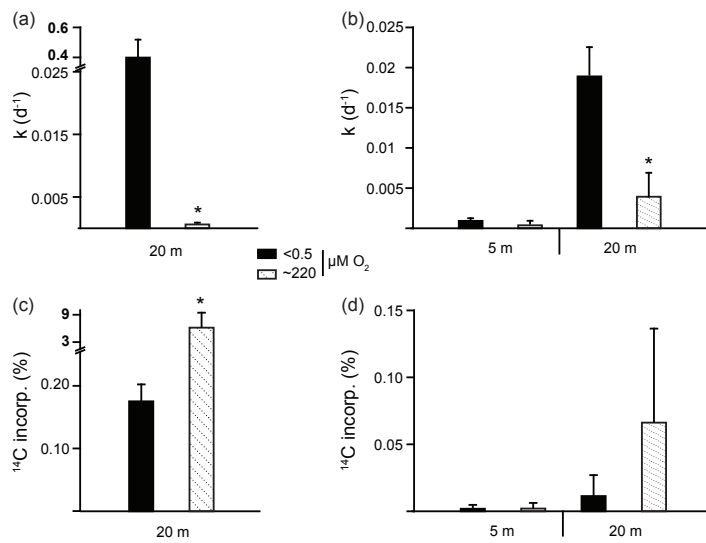

Figure S2. MOx first order rate constants ( $k$ ) at different temperatures. First order rate constants of MOx were determined with  $^3\text{H-CH}_4$  amendments in triplicated incubations of water from 5 mbsl (a-d) and 20 mbsl (e, f), recovered in Nov. 2013 (a), Feb. 2014 (b), June 2014 (c, e), and Sept. 2014 (d, f).

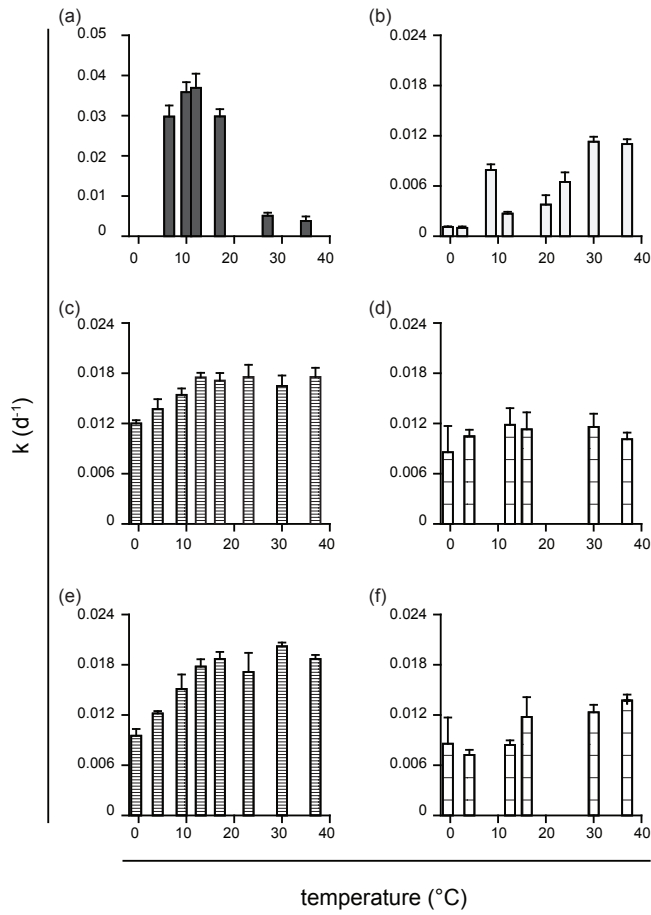

Supplement: Supplementary file 1 [file bg-2016-422-supplement.pdf]
